# Supplementary material for: NDN is an imprinted tumor suppressor gene that is downregulated in ovarian cancers through genetic and epigenetic mechanisms
Source: Oncotarget. 2015 Dec 12;7(3):3018–32. doi: 10.18632/oncotarget.6576 (PMC4823087; doi:10.18632/oncotarget.6576)
Supplement: Supplementary file 1 [file oncotarget-07-3018-s001.pdf]

## SUPPLEMENTARY FIGURES AND TABLES

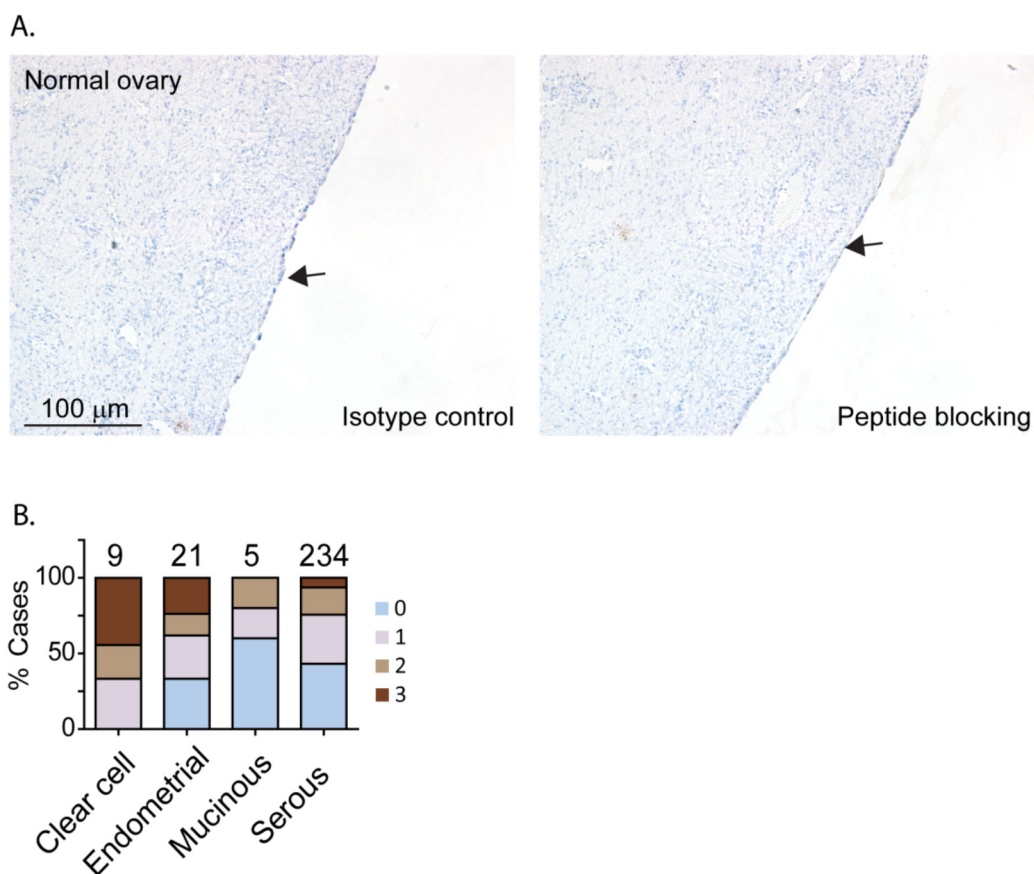

**Supplementary Figure S1: A.** Negative controls for anti-Necdin staining. Left, IgG2a kappa isotype control. Right, Necdin blocking. Anti-Necdin antibody was pre-incubated with purified GST-fused Necdin protein for 3 h before probing. Arrows point to ovarian surface epithelial layer. **B.** The distribution of necdin expression in 4 major ovarian cancer histotypes.

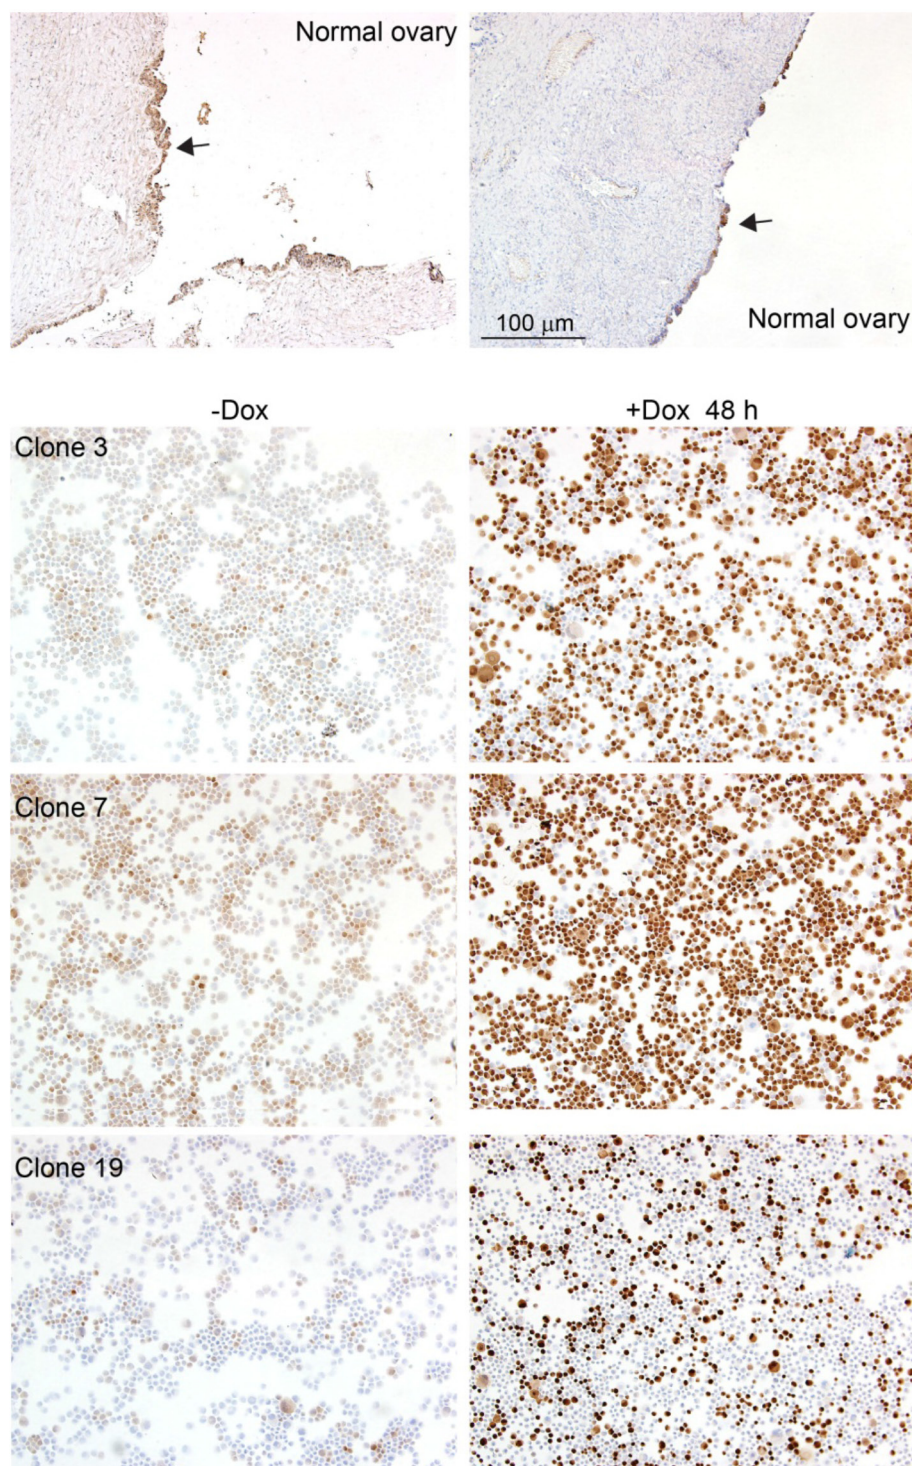

**Supplementary Figure S2: Necdin expression in normal ovaries and 3 inducible cell lines.** Normal ovary tissues were formalin fixed paraffin embedded. SKOV3ip *NDN* inducible cell lines clone 3, 7 and 19 were incubated with or without Dox for 48 h. Cells were trypsinized, spun onto (+) slides at 800 g for 5 min and air dried overnight. Cells were fixed with 4% formaldehyde in PBS for 30 min followed by 1-hr ethanol penetration at  $-20^{\circ}\text{C}$ . Standard immunohistochemistry protocol was utilized.

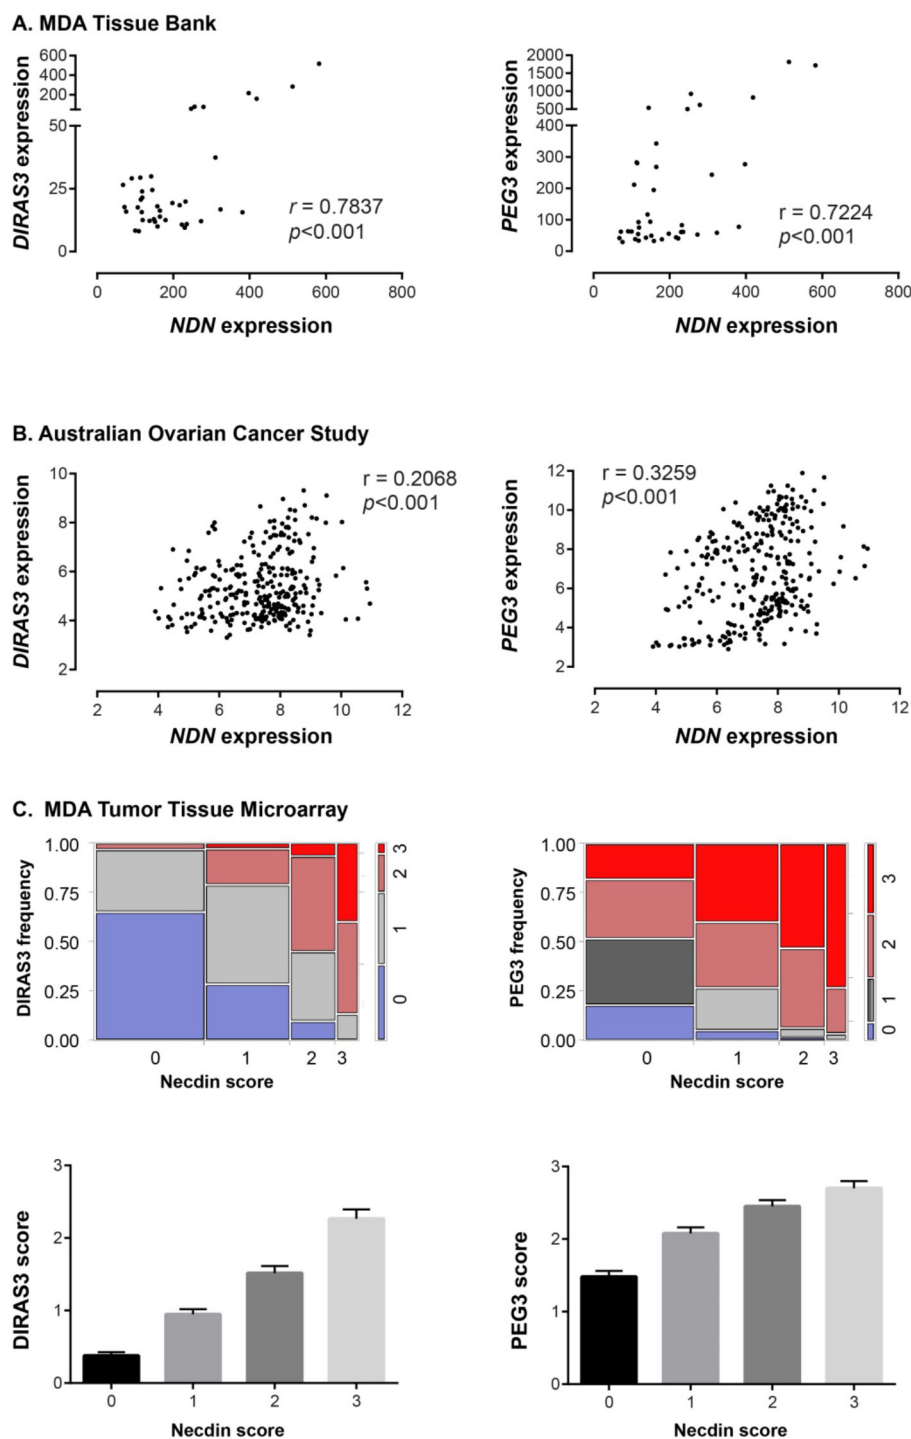

**Supplementary Figure S3: *NDN* expression correlates with the expression of *DIRAS3* and *PEG3*.** **A.** Correlation of mRNA levels using 35 ovarian cancer samples from MD Anderson Cancer Center Gynecological Tissue Bank; **B.** Correlation of mRNA levels using 295 ovarian cancer samples from AOCs database; **C.** Correlation of protein levels using ovarian cancer tissue microarrays generated by the Pathology Core of MD Anderson SPORE in Ovarian Cancer. The correlation in A and B was analyzed using Pearson correlation. Mosaic plot in C was generated using JMP software.

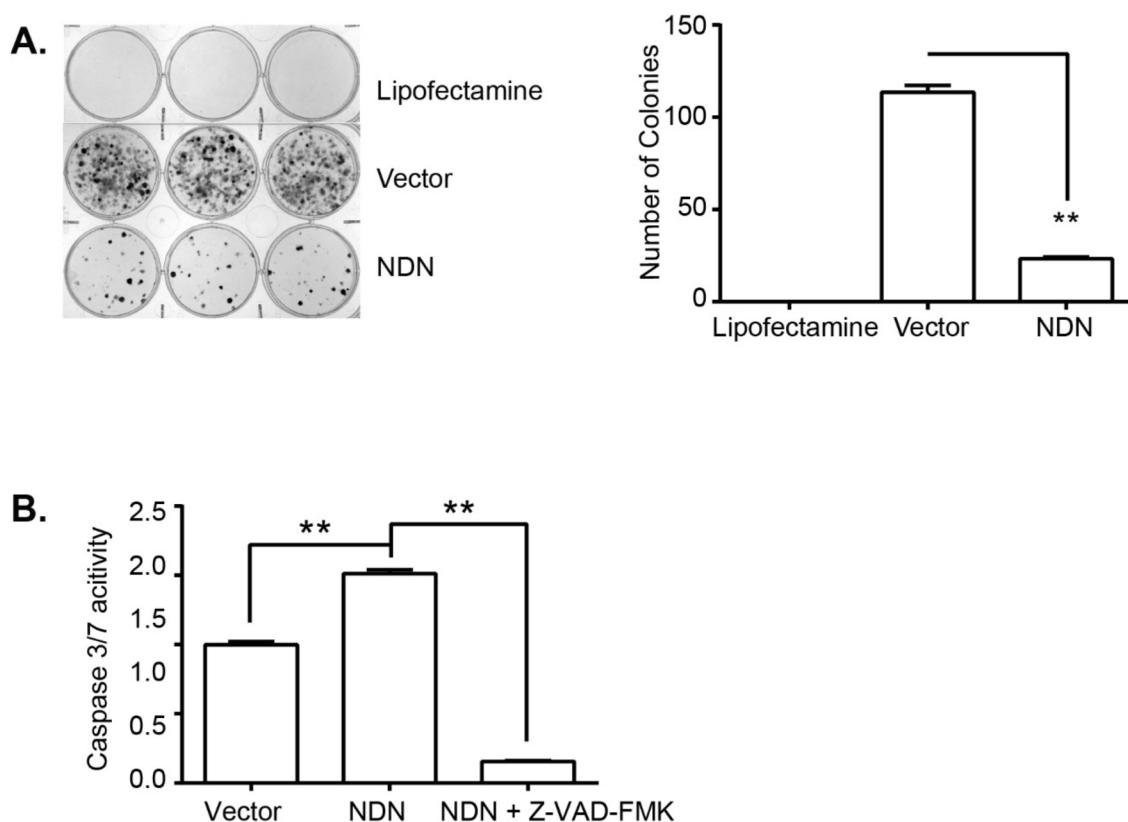

**Supplementary Figure S4: *NDN* re-expression inhibits cell growth by inducing apoptosis in HEY cell line.** **A.** *NDN* re-expression inhibits the colony formation. HEY A8 cells were transiently transfected with either empty vector or the plasmid containing *NDN* cDNA. After 24 hrs, cells were reseeded into 6-well plates at 1:16 dilution. G418 was added the next day to select transfected cells. Cells were allowed to grow for 2 weeks until the colonies were visible. Media were changed every other day. **B.** *NDN* re-expression increases caspase 3 and 7 activity. HEY cells were transfected with *NDN* for 48 hrs and Caspase 3/7 activity was measured using Caspase-Glo 3/7 assay kit from Promega.

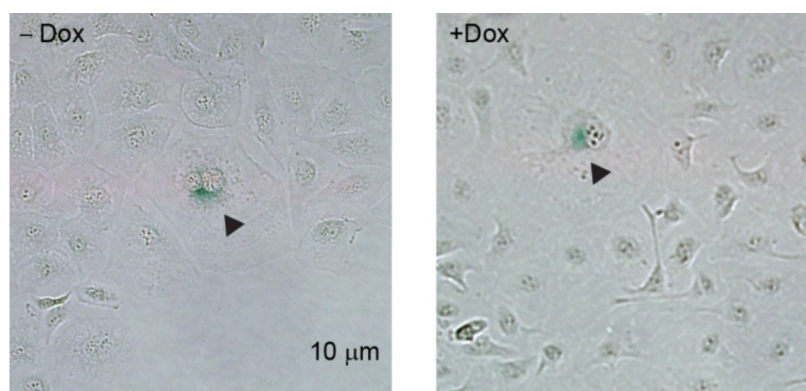

**Supplementary Figure S5: *NDN* re-expression does not induce senescence in SKOV3ip-*NDN* inducible cells.** Cells were incubated with or without Dox for 48 hrs and then stained with Senescence Cell Histochemical Staining Kit by Sigma.

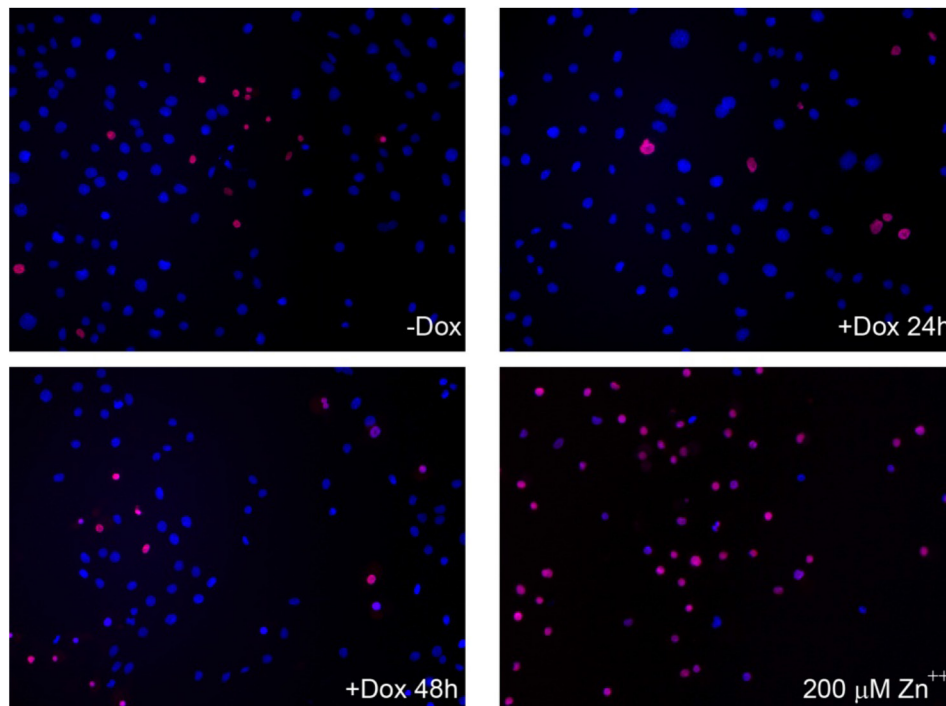

**Supplementary Figure S6: *NDN* re-expression does not induce necrosis in SKOv3ip-*NDN* inducible cells.** Cells were incubated with or without Dox and then stained with propidium iodide (PI) in red and Hoechst 33342 in blue.  $Zn^{2+}$  induced necrosis serves as a positive control.

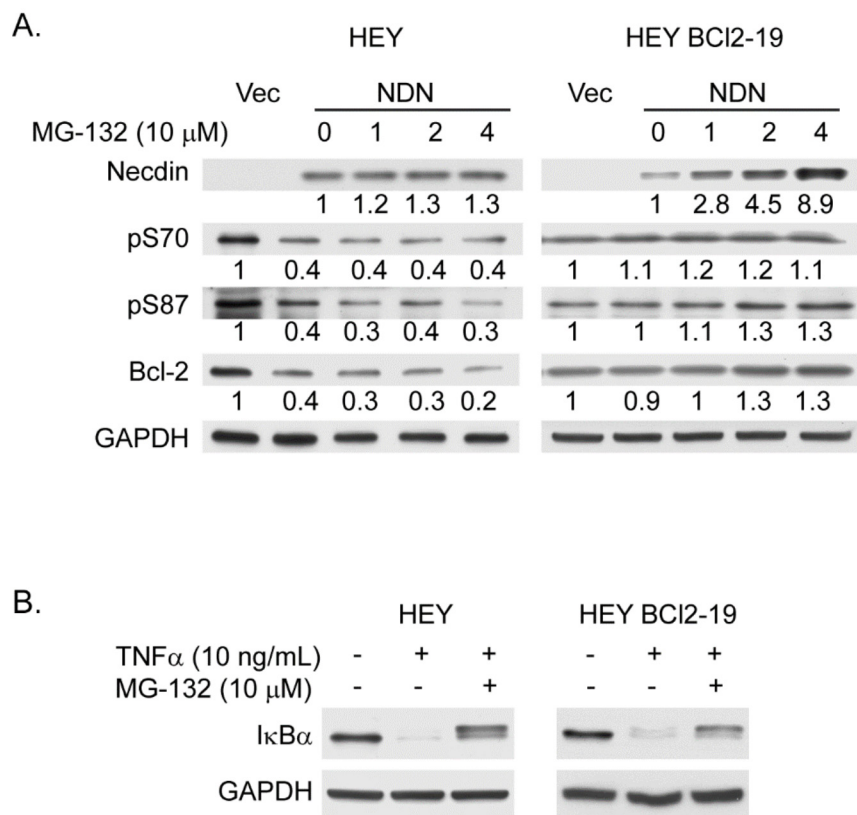

**Supplementary Figure S7: Effects of *NDN* re-expression on Bcl-2.** **A.** Proteasome inhibitor MG-132 does not restore Bcl-2 expression in WT HEY cells. HEY or HEY Bcl2-19 cell lines were transfected with empty vector or *NDN* plasmid for two days. Cells were then treated with 10  $\mu$ M MG-132 and lysed at different time points. Cell lysates were resolved on 4-15% gradient SDS-PAGE gel and blotted with antibodies. **B.** MG-132 blocks proteasomal degradation of I $\kappa$ B $\alpha$ . Cells were treated with MG-132 for 2 hours prior to TNF $\alpha$  stimulation. Cells lysates were resolved on 10% SDS-PAGE gels and blotted for I $\kappa$ B $\alpha$ , which serves as a control for MG-132.

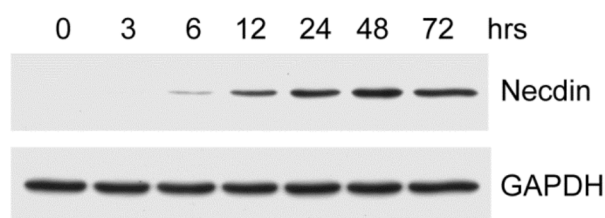

**Supplementary Figure S8: Time course of *NDN* re-expression in *NDN*-7.** *NDN* stable clone 7 was induced by doxycycline and harvested at different time points. Cell lysates were resolved on 10% SDS-PAGE gel and blotted with anti-necdin and anti-GAPDH antibodies.

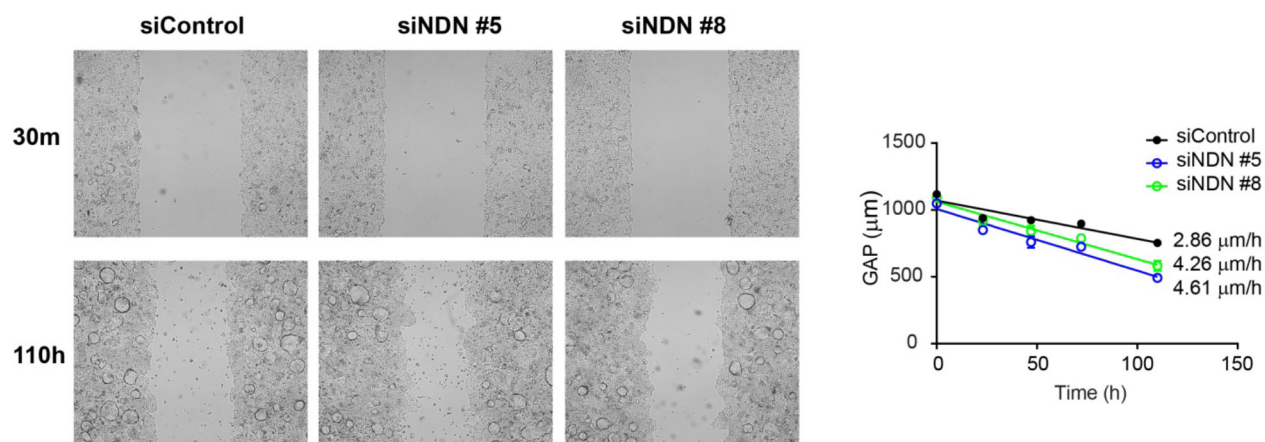

**Supplementary Figure S9: NDN depletion slightly promotes cell motility.** OVCA 432 cells were transfected with NDN siRNA. Following a scratch, the wound closure was recorded every 12 hrs up to 120 hrs. The migration speed was calculated by dividing gap width over time.

**Supplementary Table S1: Culture media for 10 ovarian cancer cell lines and primary culture of normal ovarian epithelium**

| Cell line                                 | Culture medium                                                                      | Supplement                                                                                                                                                          |
|-------------------------------------------|-------------------------------------------------------------------------------------|---------------------------------------------------------------------------------------------------------------------------------------------------------------------|
| CaOv3                                     | DMEM<br>(Mediatech 10017CV)                                                         | 200mM L-Glutamine (MT25005CI) 6ml<br>100mM Sodium Pyruvate 6ml<br>10K PEN/STREP (MT30002CI) 6ml<br>Hyclone FBS 50ml                                                 |
| SKOv3                                     | Macoy's 5A<br>(Mediatech 10050CV)                                                   | 200mM L-Glutamine (MT25005CI) 6ml<br>10K PEN/STREP (MT30002CI) 6ml<br>Hyclone FBS 50ml                                                                              |
| HEY<br>OVCAR3<br>OVCAR5<br>OC316          | RPMI1640<br>(Mediatech 15040CV)                                                     | 200mM L-Glutamine (MT25005CI) 6ml<br>100mM Sodium Pyruvate 6ml<br>10K PEN/STREP (MT30002CI) 6ml<br>Hyclone FBS 50ml (Thermo SV30014.03)                             |
| NOE                                       | MCDB105 Medium<br>(Sigma M6295-10×1L);<br>Midium 199 (Mediatech 10060CV)<br>(1:1)   | 200mM L-Glutamine (MT25005CI) 6ml<br>10K PEN/STREP (MT30002CI) 6ml<br>Hyclone FBS 50ml<br>10ug/mL EGF (Sigma E4127-0.1MG) 0.5ml                                     |
| DOV13<br>OVCA 420<br>OVCA 432<br>OVCA 433 | MEM<br>(Mediatech 10-010-CV)                                                        | 200mM L-Glutamine (MT25005CI) 6ml<br>10K PEN/STREP (MT30002CI) 6ml<br>100mM Sodium Pyruvate 6ml<br>Non-essential amino acids 6ml<br>Vitamin 6ml<br>Hyclone FBS 50ml |
| NDN inducible cell lines                  | Macoy's 5A<br>(Mediatech 10050CV)                                                   | 200mM L-Glutamine (MT25005CI) 6ml<br>10K PEN/STREP (MT30002CI) 6ml<br>Hyclone FBS 50ml<br>G418 200μg/ml<br>Puromycin 0.5μg/ml                                       |
| Ovarian epithelial<br>primary culture     | MCDB105 Medium<br>(Sigma M6295-10×1L)<br>Midium 199<br>(Mediatech 10060CV)<br>(1:1) | 200mM L-Glutamine (MT25005CI) 6ml<br>10K PEN/STREP (MT30002CI) 6ml<br>Hyclone FBS 50ml<br>10ug/mL EGF (Sigma E4127-0.1MG) 0.5ml                                     |

**Supplementary Table S2: Antibodies and reagents**

| Antibodies and reagents     | Species | Vendor         | Catalog       |
|-----------------------------|---------|----------------|---------------|
| BAX antibody                | Mouse   | Santa Cruz     | Sc-20067      |
| Bcl-2 antibody              | Mouse   | Santa Cruz     | Sc-509        |
| Bcl-2 S70 antibody          | Rabbit  | Cell Signaling | 2827          |
| Bcl-2 S87 antibody          | Rabbit  | Santa Cruz     | Sc-16323-R    |
| Cleaved caspase 3 antibody  | Rabbit  | Millipore      | AB3623        |
| Cleaved caspase 7 antibody  | Rabbit  | Cell Signaling | 8438          |
| FAK pY397 antibody          | Rabbit  | Cell Signaling | 8556          |
| FAK pY925 antibody          | Rabbit  | Cell Signaling | 3284          |
| Total FAK antibody          | Rabbit  | Cell Signaling | 3285          |
| GAPDH antibody              | Mouse   | Millipore      | MAB374        |
| LC3B antibody               | Rabbit  | Cell Signaling | 2775          |
| Necdin antibody             | Mouse   | Novus          | H00004692-M07 |
| Necdin control IgG2a kappa  | Mouse   | Novus          | NBP1-43318    |
| Necdin Recombinant protein  |         | Novus          | H00004692-P01 |
| Paxillin antibody           | Rabbit  | Cell Signaling | 12065         |
| RhoA antibody               | Rabbit  | Cell Signaling | 2117          |
| XIAP antibody               | Rabbit  | BD Bioscience  | 610762        |
| Oregon Green 488 phalloidin | Mouse   | Invitrogen     | O7466         |

**Supplementary Table S3: Pathologic features of ovarian cancer samples for Affymetrix array analysis**

| Histology   | No. |
|-------------|-----|
| Serous      | 17  |
| Mucinous    | 5   |
| Clear cell  | 4   |
| Endometrial | 9   |
| Total       | 35  |

**Supplementary Table S4: Patient characteristics of paired samples for LOH and DNA methylation**

| Clinical and pathologic features | No. |
|----------------------------------|-----|
| Stage                            |     |
| I                                | 7   |
| II                               | 4   |
| III                              | 22  |
| IV                               | 10  |
| Histology                        |     |
| Serous                           | 18  |
| Endometrial                      | 5   |
| Clear cell                       | 3   |
| Granulosa cell                   | 3   |
| Transitional cell                | 1   |
| Mixed                            | 13  |

## Supplementary Table S5: Summary of methylation, LOH and expression in paired normal and tumor specimens

## Supplementary Table S6: Methylation profile in paired normal and tumor specimens

|                   | Methylation level           | CpG 1       | CpG 2       |
|-------------------|-----------------------------|-------------|-------------|
| Promoter region   | Average normal <sup>a</sup> | 35.6 ± 4.8  | 41.6 ± 5.8  |
|                   | Average tumor <sup>b</sup>  | 38.7 ± 14.3 | 44.1 ± 15.4 |
|                   | % Hyper <sup>1</sup>        | 23%         | 30%         |
|                   | % Normal <sup>2</sup>       | 65%         | 51%         |
|                   | % Hypo <sup>3</sup>         | 12%         | 19%         |
| Imprinting Center | Methylation level           | CpG A       | CpG B       |
|                   | Average normal <sup>a</sup> | 49.8 ± 4.4  | 42.7 ± 6.0  |
|                   | Average tumor <sup>b</sup>  | 48.4 ± 14.9 | 39.3 ± 13.4 |
|                   | % Hyper <sup>1</sup>        | 16%         | 5%          |
|                   | % Normal <sup>2</sup>       | 63%         | 79%         |
|                   | % Hypo <sup>3</sup>         | 21%         | 16%         |

<sup>a</sup>Average methylation levels (%) in normal tissues detected by pyrosequencing.

<sup>b</sup>Average methylation levels (%) in paired tumor tissues detected by pyrosequencing.

<sup>1</sup>Percentage of tumor specimens in which methylation levels are at least 2 standard deviation above normal specimens.

<sup>2</sup>Percentage of tumor specimens in which methylation levels are between 2 standard deviation from normal specimens.

<sup>3</sup>Percentage of tumor specimens in which methylation levels are at least 2 standard deviation below normal specimens.
